# Supplementary material for: Secondary Metabolite Production Potential in a Microbiome of the Freshwater Sponge Spongilla lacustris
Source: PubMed Central journal article supplement (PMC10100984; doi:10.1128/spectrum.04353-22), 2023-02-02
Supplement: spectrum.04353-22-s0001.pdf [file spectrum.04353-22-s0001.pdf]

## **Supplemental Material**

**Bacteria associated with the fresh-water sponge *Spongilla lacustris* and their potential to produce secondary metabolites revealed via genomics, metagenomics and genome mining**

Sophie Graffius, Jaime Felipe Guerrero Garzón, Martin Zehl, Petra Pjevac, Rasmus Kirkegaard, Mathias Flieder, Alexander Loy, Thomas Rattei, Andrew Ostrovsky, Sergey B. Zotchev

**Table S1.** Summary of MAGs retrieved from *Spongilla lacustris* metagenome and their GTDB-based taxonomy.

| MAG                              | marker lineage        | completeness | contamination | GC, % | genome size | scaffolds | contigs | longest scaffold | longest contig | phylum_gtdb       | class_gtdb          | order_gtdb          | family_gtdb       | genus_gtdb        | gtdb_closest    | environment                       |
|----------------------------------|-----------------------|--------------|---------------|-------|-------------|-----------|---------|------------------|----------------|-------------------|---------------------|---------------------|-------------------|-------------------|-----------------|-----------------------------------|
| <i>Spongilla lacustris</i> MAG01 | k_Bacteria            | 78.42        | 0.00          | 35.4  | 475425      | 5         | 8       | 206783           | 113061         | Patescibacteria   | Paceibacteria       | UBA9983             | UBA2163           | J119              | GCA_003694545.1 | iron-rich hot spring              |
| <i>Spongilla lacustris</i> MAG02 | k_Bacteria            | 100.00       | 8.62          | 59.0  | 3101799     | 39        | 41      | 295652           | 295652         | Proteobacteria    | Gammaproteobacteria | Burkholderiales     | Burkholderiaceae  | Limnohabitans     | GCA_005789825.1 | freshwater lake                   |
| <i>Spongilla lacustris</i> MAG03 | p_Bacteroidetes       | 98.57        | 0.95          | 40.7  | 4628720     | 74        | 86      | 411324           | 376971         | Bacteroidota      | Bacteroidia         | AKYH767             | B-17B0            | -                 | GCA_002342065.1 | freshwater lake                   |
| <i>Spongilla lacustris</i> MAG04 | c_Gammaproteobacteria | 87.26        | 0.00          | 36.5  | 1716532     | 16        | 30      | 476275           | 476275         | Proteobacteria    | Gammaproteobacteria | GCA-002705445       | GCA-002716945     | -                 | NA              | NA                                |
| <i>Spongilla lacustris</i> MAG05 | p_Bacteroidetes       | 98.52        | 1.97          | 38.9  | 2493715     | 127       | 129     | 88460            | 88460          | Bacteroidota      | Bacteroidia         | Chitinophagales     | Chitinophagaceae  | UBA1312           | GCA_002482815.1 | water, biofilm                    |
| <i>Spongilla lacustris</i> MAG06 | k_Bacteria            | 69.80        | 4.31          | 28.6  | 587916      | 85        | 118     | 40569            | 18454          | Patescibacteria   | Paceibacteria       | UBA9984             | UBA5272           | -                 | GCA_003518045.1 | groundwater                       |
| <i>Spongilla lacustris</i> MAG07 | k_Bacteria            | 89.89        | 0.55          | 32.0  | 2551601     | 156       | 209     | 87631            | 83425          | Bacteroidota      | Bacteroidia         | Cytophagales        | -                 | -                 | NA              | NA                                |
| <i>Spongilla lacustris</i> MAG08 | p_Bacteroidetes       | 86.70        | 0.99          | 34.1  | 2276483     | 203       | 219     | 51600            | 51600          | Bacteroidota      | Bacteroidia         | Chitinophagales     | Chitinophagaceae  | Hydrotalea        | NA              | NA                                |
| <i>Spongilla lacustris</i> MAG09 | c_Alphaproteobacteria | 82.25        | 0.43          | 52.4  | 2299014     | 350       | 403     | 29586            | 27420          | Proteobacteria    | Alphaproteobacteria | Elsterales          | -                 | -                 | NA              | NA                                |
| <i>Spongilla lacustris</i> MAG10 | c_Alphaproteobacteria | 93.26        | 2.83          | 53.0  | 2719869     | 355       | 359     | 54419            | 54419          | Proteobacteria    | Alphaproteobacteria | -                   | -                 | -                 | NA              | NA                                |
| <i>Spongilla lacustris</i> MAG11 | p_Bacteroidetes       | 90.37        | 0.99          | 31.3  | 2716763     | 166       | 175     | 139035           | 139035         | Bacteroidota      | Bacteroidia         | Chitinophagales     | Chitinophagaceae  | Sediminibacterium | NA              | NA                                |
| <i>Spongilla lacustris</i> MAG12 | k_Bacteria            | 78.98        | 0.07          | 67.7  | 2148011     | 426       | 429     | 26040            | 26040          | Planctomycetota   | Phycisphaerae       | Phycisphaerales     | SM1A02            | SYIB01            | GCA_005798965.1 | freshwater lake                   |
| <i>Spongilla lacustris</i> MAG13 | k_Bacteria            | 81.07        | 1.14          | 59.7  | 3350352     | 489       | 585     | 38525            | 38525          | Planctomycetota   | Phycisphaerae       | Phycisphaerales     | SM1A03            | QWPT01            | GCA_003671075.1 | freshwater lake                   |
| <i>Spongilla lacustris</i> MAG14 | o_Burkholderiales     | 54.73        | 0.06          | 44.0  | 1579445     | 270       | 278     | 26364            | 26364          | Proteobacteria    | Gammaproteobacteria | Burkholderiales     | Burkholderiaceae  | Symbiobacter      | GCF_000477435.1 | freshwater lake                   |
| <i>Spongilla lacustris</i> MAG15 | k_Bacteria            | 87.23        | 1.35          | 53.1  | 1871277     | 100       | 163     | 165013           | 134855         | Verrucomicrobiota | Verrucomicrobiae    | Methylacidiphilales | UBA3015           | UBA3015           | GCA_001438005.1 | Baltic Sea brackish surface water |
| <i>Spongilla lacustris</i> MAG16 | k_Bacteria            | 96.77        | 1.08          | 48.9  | 1679970     | 91        | 119     | 152443           | 152443         | Proteobacteria    | Alphaproteobacteria | Elsterales          | -                 | -                 | NA              | NA                                |
| <i>Spongilla lacustris</i> MAG17 | p_Bacteroidetes       | 96.85        | 1.23          | 36.1  | 3902886     | 134       | 235     | 123109           | 73227          | Bacteroidota      | Bacteroidia         | Chitinophagales     | Chitinophagaceae  | -                 | NA              | NA                                |
| <i>Spongilla lacustris</i> MAG18 | p_Cyanobacteria       | 77.04        | 5.21          | 66.7  | 2492058     | 199       | 250     | 150199           | 94616          | Cyanobacteria     | Cyanobacteriia      | PCC-6307            | Cyanobiaceae      | Cyanobium_A       | GCA_007135755.1 | hypersaline soda lake sediment    |
| <i>Spongilla lacustris</i> MAG19 | o_Burkholderiales     | 98.21        | 0.03          | 52.5  | 2643449     | 26        | 29      | 344907           | 344907         | Proteobacteria    | Gammaproteobacteria | Burkholderiales     | Burkholderiaceae  | Limnohabitans     | GCA_005789825.1 | freshwater lake                   |
| <i>Spongilla lacustris</i> MAG20 | f_Flavobacteriaceae   | 98.23        | 3.49          | 31.2  | 4979690     | 313       | 339     | 202147           | 178244         | Bacteroidota      | Bacteroidia         | Flavobacteriales    | Flavobacteriaceae | Flavobacterium    | NA              | NA                                |

**Table S2.** List of the oligonucleotide primers used in this work.

| <b>Name</b>         | <b>Sequence (5'-3')</b>        | <b>Purpose</b>                                   |
|---------------------|--------------------------------|--------------------------------------------------|
| <b>ermEp_Fw</b>     | GTCATCTAGAGGTGAACTTCGCACTTCG   | Construction of pSET152_ermE*p plasmid           |
| <b>ermEp_Rv</b>     | TCCGGCTCGTATGTTGTG             | Construction of pSET152_ermE*p plasmid           |
| <b>ctg3_1243_Fw</b> | GTCAGCGGCCGCATGACCACGGCAATGCAG | Construction of pSET152_ermE*p_ctg3_1243 plasmid |
| <b>ctg3_1243_Rv</b> | GTCAGAATTCGCGACGACCTGGCCTGAC   | Construction of pSET152_ermE*p_ctg3_1243 plasmid |

**Table S3.** BGCs identified in the genome of *Streptomyces* sp. SL203 with antiSMASH version 6.1.1.

| BGC  | Type                       | From      | To        | Most similar known BGC | Similarity | Presence in another bacterium            | Found and assigned NP  |
|------|----------------------------|-----------|-----------|------------------------|------------|------------------------------------------|------------------------|
| 3.1  | butyrolactone              | 237,860   | 246,265   | -                      | -          | <i>Streptomyces</i> sp. PAMC 26508       | -                      |
| 3.2  | NRPS                       | 319,354   | 372,367   | rimosamide             | 21%        | <i>Streptomyces</i> sp. PAMC 26508       | detoxin S <sub>1</sub> |
| 3.3  | PKSII, terpene             | 514,723   | 586,172   | spore pigment          | 83%        | <i>Streptomyces</i> sp. PAMC 26508       | -                      |
| 3.4  | melanin                    | 612,086   | 622,550   | melanin                | 100%       | <i>Streptomyces pratensis</i> ATCC 33331 | -                      |
| 3.5  | PKSIII                     | 719,172   | 760,230   | -                      | -          | <i>Streptomyces pratensis</i> ATCC 33331 | -                      |
| 3.6  | RiPP-like                  | 919,628   | 926,490   | -                      | -          | <i>Streptomyces pratensis</i> ATCC 33331 | -                      |
| 3.7  | terpene, ectoine           | 957,073   | 977,440   | ectoine                | 100%       | <i>Streptomyces pratensis</i> ATCC 33331 | ectoine                |
| 3.8  | terpene                    | 1,258,237 | 1,278,832 | -                      | -          | <i>Streptomyces pratensis</i> ATCC 33331 | -                      |
| 3.9  | PKSII, PKS-like            | 1,323,735 | 1,396,271 | cinerubin B            | 25%        | <i>Streptomyces pratensis</i> ATCC 33331 | coprisidin A/B         |
| 3.10 | ectoine                    | 1,758,007 | 1,768,405 | ectoine                | 100%       | <i>Streptomyces pratensis</i> ATCC 33331 | ectoine                |
| 3.11 | terpene                    | 2,230,079 | 2,249,836 | -                      | -          | <i>Streptomyces</i> sp. PAMC 26508       | -                      |
| 3.12 | lanthipeptide class III    | 2,690,330 | 2,712,981 | -                      | -          | <i>Streptomyces</i> sp. CB01580          | -                      |
| 3.13 | siderophore                | 2,757,623 | 2,769,263 | desferrioxamine B/E    | 83%        | <i>Streptomyces</i> sp. PAMC 26508       | (dehydroxy)nocardamine |
| 3.14 | NRPS, PKS, NRPS-like       | 3,413,177 | 3,467,764 | -                      | -          | <i>Streptomyces pratensis</i> ATCC 33331 | -                      |
| 3.15 | butyrolactone              | 3,667,911 | 3,678,837 | -                      | -          | <i>Streptomyces pratensis</i> ATCC 33331 | -                      |
| 3.16 | RiPP-like                  | 5,333,512 | 5,342,409 | -                      | -          | <i>Streptomyces</i> sp. PAMC 26508       | -                      |
| 3.17 | terpene                    | 5,500,170 | 5,520,316 | -                      | -          | <i>Streptomyces pratensis</i> ATCC 33331 | -                      |
| 3.18 | siderophore                | 5,585,671 | 5,600,255 | -                      | -          | <i>Streptomyces pratensis</i> ATCC 33331 | -                      |
| 3.19 | NRPS                       | 5,872,256 | 5,927,100 | -                      | -          | <i>Streptomyces pratensis</i> ATCC 33331 | -                      |
| 3.20 | lanthipeptide class I      | 5,947,894 | 5,974,342 | -                      | -          | <i>Streptomyces</i> sp. ADI97-07         | -                      |
| 3.21 | RiPP-like                  | 6,094,486 | 6,103,893 | -                      | -          | <i>Streptomyces</i> sp. ADI97-07         | -                      |
| 3.22 | PKSI                       | 6,320,692 | 6,408,208 | sceliphrolactam        | 88%        | <i>Streptomyces pratensis</i> ATCC 33331 | sceliphrolactam        |
| 3.23 | terpene                    | 6,747,935 | 6,773,426 | hopene                 | 69%        | <i>Streptomyces anulatus</i> ATCC 11523  | -                      |
| 3.24 | $\beta$ -lactam            | 6,831,354 | 6,850,351 | clavulanic acid        | 20%        | <i>Streptomyces</i> sp. PAMC 26508       | -                      |
| 3.25 | RiPP-like                  | 6,920,994 | 6,931,518 | -                      | -          | <i>Streptomyces pratensis</i> ATCC 33331 | -                      |
| 3.26 | terpene                    | 7,070,847 | 7,096,339 | isorenieratene         | 100%       | <i>Streptomyces pratensis</i> ATCC 33331 | -                      |
| 3.27 | NRPS                       | 7,110,740 | 7,160,490 | coelichelin            | 90%        | <i>Streptomyces pratensis</i> ATCC 33331 | coelichelin            |
| 3.28 | $\beta$ -lactam, PKS, NRPS | 7,277,936 | 7,418,487 | carbapenem MM4550      | 55%        | <i>Streptomyces pratensis</i> ATCC 33331 | -                      |

**Table S4.** BGCs identified in the genome of *Streptomyces* sp. SL294 with antiSMASH version 6.1.1.

| BGC  | Type                                               | From      | To        | Most similar known BGC | Similarity | Presence in another bacterium            | Found and assigned NP  |
|------|----------------------------------------------------|-----------|-----------|------------------------|------------|------------------------------------------|------------------------|
| 3.1  | NRPS, PKSII, $\beta$ -lactam                       | 128,640   | 268,174   | carbapenem MM4550      | 58%        | <i>Streptomyces pratensis</i> ATCC 33331 | -                      |
| 3.2  | NRPS                                               | 385,716   | 436,620   | coelichelin            | 90%        | <i>Streptomyces pratensis</i> ATCC 33331 | coelichelin            |
| 3.3  | terpene                                            | 451,251   | 475,851   | isorenieratene         | 100%       | <i>Streptomyces pratensis</i> ATCC 33331 | -                      |
| 3.4  | RiPP-like                                          | 616,557   | 625,518   | -                      | -          | <i>Streptomyces pratensis</i> ATCC 33331 | -                      |
| 3.5  | $\beta$ -lactam                                    | 692,238   | 715,732   | clavulanic acid        | 20%        | <i>Streptomyces microflavus</i> CG 893   | -                      |
| 3.6  | terpene                                            | 772,612   | 799,206   | hopene                 | 69%        | <i>Streptomyces pratensis</i> ATCC 33331 | -                      |
| 3.7  | PKSI                                               | 1,138,589 | 1,233,400 | sceliphrolactam        | 88%        | <i>Streptomyces pratensis</i> ATCC 33331 | sceliphrolactam        |
| 3.8  | RiPP-like                                          | 1,441,862 | 1,453,154 | -                      | -          | <i>Streptomyces</i> sp. ADI97-07         | -                      |
| 4.1  | lanthipeptide class I                              | 73,205    | 99,734    | -                      | -          | <i>Streptomyces</i> sp. ADI97-07         | -                      |
| 4.2  | NRPS                                               | 120,528   | 175,401   | -                      | -          | <i>Streptomyces</i> sp. S501             | -                      |
| 4.3  | siderophore                                        | 448,476   | 461,607   | -                      | -          | <i>Streptomyces pratensis</i> ATCC 33331 | -                      |
| 4.4  | terpene                                            | 527,356   | 547,053   | -                      | -          | <i>Streptomyces pratensis</i> ATCC 33331 | -                      |
| 4.5  | RiPP-like                                          | 705,268   | 714,816   | -                      | -          | <i>Streptomyces pratensis</i> ATCC 33331 | -                      |
| 4.6  | butyrolactone                                      | 2,368,883 | 2,379,809 | -                      | -          | <i>Streptomyces pratensis</i> ATCC 33331 | -                      |
| 4.7  | NRPS-like, PKSII, NRPS                             | 2,579,964 | 2,634,827 | -                      | -          | <i>Streptomyces pratensis</i> ATCC 33331 | -                      |
| 4.8  | siderophore                                        | 3,279,372 | 3,291,153 | desferrioxamine B/E    | 83%        | <i>Streptomyces microflavus</i> CG 893   | (dehydroxy)nocardamine |
| 4.9  | lanthipeptide class III,<br>lanthipeptide class II | 3,335,681 | 3,366,663 | -                      | -          | <i>Streptomyces microflavus</i> CG 893   | -                      |
| 4.10 | terpene                                            | 3,798,845 | 3,818,603 | -                      | -          | <i>Streptomyces microflavus</i> CG 893   | -                      |
| 4.11 | ectoine                                            | 4,281,704 | 4,290,312 | ectoine                | 100%       | <i>Streptomyces pratensis</i> ATCC 33331 | ectoine                |
| 4.12 | PKSII, PKS-like                                    | 4,652,529 | 4,725,065 | cinerubin B            | 25%        | <i>Streptomyces pratensis</i> ATCC 33331 | coprisidin A/B         |
| 4.13 | terpene                                            | 4,769,968 | 4,790,570 | -                      | -          | <i>Streptomyces pratensis</i> ATCC 33331 | -                      |
| 4.14 | terpene, ectoine                                   | 5,070,871 | 5,092,300 | ectoine                | 100%       | <i>Streptomyces pratensis</i> ATCC 33331 | ectoine                |
| 4.15 | RiPP-like                                          | 5,120,490 | 5,130,717 | -                      | -          | <i>Streptomyces pratensis</i> ATCC 33331 | -                      |

**Table S5.**  $^1\text{H}$  (700 MHz, DMSO- $d_6$ ) and  $^{13}\text{C}$  NMR data (176 MHz, DMSO- $d_6$ ) of **8** in comparison with literature data for coprisidin A ( $\delta$  in ppm).

| <b>8</b> |                                  | Coprisidin A <sup>a</sup>  |                                  |                            |
|----------|----------------------------------|----------------------------|----------------------------------|----------------------------|
| Position | $\delta_{\text{H}}$ ( $J$ in Hz) | $\delta_{\text{C}}$ , type | $\delta_{\text{H}}$ ( $J$ in Hz) | $\delta_{\text{C}}$ , type |
| 1        | —                                | n.d.                       | —                                | 183.7, C                   |
| 1a       | —                                | 123.77, C                  | —                                | 123.6, C                   |
| 2        | —                                | n.d.                       | —                                | 147.2, C                   |
| 3        | —                                | n.d.                       | —                                | 155.5, C                   |
| 3-OH     | 10.61, br s                      | —                          | 10.86, s                         | —                          |
| 4        | —                                | n.d.                       | —                                | 131.0, C                   |
| 5        | 7.44, s                          | 120.54, CH                 | 7.47, s                          | 120.4, CH                  |
| 5a       | —                                | n.d.                       | —                                | 122.3, C                   |
| 6        | —                                | n.d.                       | —                                | 179.7, C                   |
| 7        | —                                | n.d.                       | —                                | 154.1, C                   |
| 7-OH     | 10.61, br s                      | —                          | 10.60, br s                      | —                          |
| 8        | —                                | n.d.                       | —                                | 124.6, C                   |
| 9        | 2.37, t (7.5)                    | 24.78, CH <sub>2</sub>     | 2.38, t (7.0)                    | 24.8, CH <sub>2</sub>      |
| 10       | 1.40, qt (7.5, 7.4)              | 21.18, CH <sub>2</sub>     | 1.41, qt (7.0, 7.0)              | 21.2, CH <sub>2</sub>      |
| 11       | 0.87, t (7.4)                    | 14.09, CH <sub>3</sub>     | 0.88, t (7.0)                    | 14.1, CH <sub>3</sub>      |
| 12       | 3.76, s                          | n.d.                       | 3.77, s                          | 61.5, CH <sub>3</sub>      |
| NH       | 8.77, s                          | —                          | 8.81, s                          | —                          |
| 2'       | —                                | 170.35, C                  | —                                | 170.3, C                   |
| 3'       | 5.99, s                          | 53.88, CH                  | 6.00, s                          | 53.8, CH                   |
| 3'a      | —                                | 116.34, C                  | —                                | 116.4, C                   |
| 4'       | —                                | 155.24, C                  | —                                | 155.3, C                   |
| 4'-OH    | 9.64, s                          | —                          | 9.80, s                          | —                          |
| 5'       | 6.86, d (7.5)                    | 113.93, CH                 | 6.85, d (7.5)                    | 113.9, CH                  |
| 6'       | 7.31, dd (8.1, 7.5)              | 133.73, CH                 | 7.32, dd (7.5, 7.5)              | 133.9, CH                  |
| 7'       | 6.79, d (8.1)                    | 115.02, CH                 | 6.81, d (7.5)                    | 115.2, CH                  |
| 7'a      | —                                | n.d.                       | —                                | 149.3, C                   |

<sup>a</sup> Um, S., Bach, D. H., Shin, B., Ahn, C. H., Kim, S. H., Bang, H. S., Oh, K. B., Lee, S. K., Shin, J. and Oh, D. C., 2016. Naphthoquinone-Oxindole Alkaloids, Coprisidins A and B, from a Gut-Associated Bacterium in the Dung Beetle, *Copris tripartitus*. *Organic letters*, 18(22), 5792–5795. <https://doi.org/10.1021/acs.orglett.6b02555>

**Table S6.**  $^1\text{H}$  (600 MHz, DMSO- $d_6$ ) and  $^{13}\text{C}$  NMR data (151 MHz, DMSO- $d_6$ ) of **14** in comparison with literature data for saccharoquinoline ( $\delta$  in ppm).

| <b>14</b> |                                                  |                            | Saccharoquinoline <sup>a</sup>                 |                            |
|-----------|--------------------------------------------------|----------------------------|------------------------------------------------|----------------------------|
| Position  | $\delta_{\text{H}}$ ( $J$ in Hz)                 | $\delta_{\text{C}}$ , type | $\delta_{\text{H}}$ ( $J$ in Hz)               | $\delta_{\text{C}}$ , type |
| 1         | 1.84, brd (12.5);<br>1.00, td (13.0, 2.9)        | 38.49, CH <sub>2</sub>     | 1.83, d (14.3);<br>0.99, brd;                  | 38.5, CH <sub>2</sub>      |
| 2         | 1.65 <sup>b,c</sup> , m; 1.45 <sup>b,c</sup> , m | 18.07, CH <sub>2</sub>     | 1.66, m; 1.44, m                               | 18.0, CH <sub>2</sub>      |
| 3         | 1.39 <sup>b</sup> , brd; 1.17 <sup>b,c</sup> , m | 41.36, CH <sub>2</sub>     | 1.39; 1.18                                     | 41.3, CH <sub>2</sub>      |
| 4         | —                                                | 32.88, C                   | —                                              | 32.8, C                    |
| 5         | 1.09, d (11.8)                                   | 55.33, CH                  | 1.08                                           | 55.3, CH                   |
| 6         | 1.74 <sup>b,c</sup> , m; 1.43 <sup>b,c</sup> , m | 19.27, CH <sub>2</sub>     | 1.74, m; 1.42, m                               | 19.3, CH <sub>2</sub>      |
| 7         | 2.14, m; 1.73 <sup>b,c</sup> , m                 | 40.33, CH <sub>2</sub>     | 2.15, dt (12.3, 3.6); 1.73                     | 40.3, CH <sub>2</sub>      |
| 8         | —                                                | 78.17, C                   | —                                              | 78.1, C                    |
| 9         | 1.67 <sup>b</sup> , dd (12.8, 5.1)               | 51.26, CH                  | 1.67                                           | 51.2, CH                   |
| 10        | —                                                | 36.60, C                   | —                                              | 36.6, C                    |
| 11        | 2.91, dd (16.4, 5.0);<br>2.70, dd (16.2, 13.1)   | 17.90, CH <sub>2</sub>     | 2.91, dd (16.8, 13.1);<br>2.69, dd (16.8, 5.2) | 17.9, CH <sub>2</sub>      |
| 12        | 0.85, s                                          | 21.47, CH <sub>3</sub>     | 0.85, s                                        | 21.5, CH <sub>3</sub>      |
| 13        | 0.91, s                                          | 33.22, CH <sub>3</sub>     | 0.90, s                                        | 33.2, CH <sub>3</sub>      |
| 14        | 0.94, s                                          | 14.58, CH <sub>3</sub>     | 0.94, s                                        | 14.6, CH <sub>3</sub>      |
| 15        | 1.18 <sup>b</sup> , s                            | 20.37, CH <sub>3</sub>     | 1.18, s                                        | 20.3, CH <sub>3</sub>      |
| 1'        | —                                                | 104.86, C                  | —                                              | 104.9, C                   |
| 2'        | —                                                | 122.84, C                  | —                                              | 122.8, C                   |
| 3'        | —                                                | 133.60, C                  | —                                              | 133.6, C                   |
| 4'        | —                                                | 135.04, C                  | —                                              | 135.0, C                   |
| 5'        | —                                                | 136.96, C                  | —                                              | 136.9, C                   |
| 6'        | —                                                | 145.80, C                  | —                                              | 145.8, C                   |
| 7'        | 8.40, d (8.6)                                    | 132.09, CH                 | 8.40, d (8.6)                                  | 132.1, CH                  |
| 8'        | 7.92, d (8.6)                                    | 116.93, CH                 | 7.92, d (8.6)                                  | 116.9, CH                  |
| 9'        | —                                                | 140.90, C                  | —                                              | 140.8, C                   |
| 10'       | —                                                | 165.58, C                  | —                                              | 165.6, C                   |

<sup>a</sup> Le, T. C., Lee, E. J., Lee, J., Hong, A., Yim, C. Y., Yang, I., Choi, H., Chin, J., Cho, S. J., Ko, J., Hwang, H., Nam, S. J. and Fenical, W., 2019. Saccharoquinoline, a Cytotoxic Alkaloidal Meroterpenoid from Marine-Derived Bacterium *Saccharomonospora* sp. *Marine Drugs*, 17(2), 98. <https://doi.org/10.3390/md17020098>

<sup>b</sup> Overlapping signal. <sup>c</sup> Value determined from the HSQC spectrum.

**Figure S1.**

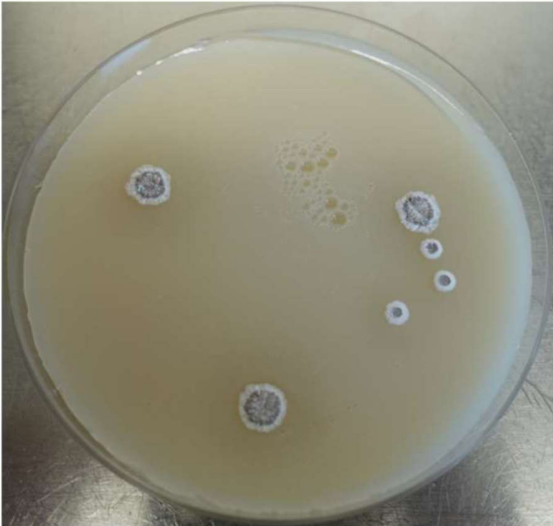

*Streptomyces* sp. SL203

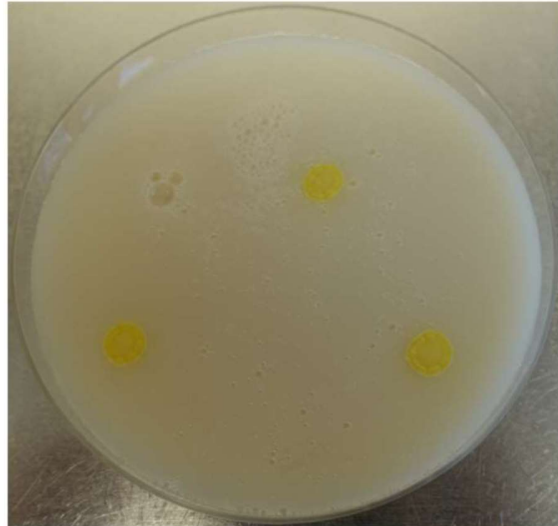

*Streptomyces* sp. SL294



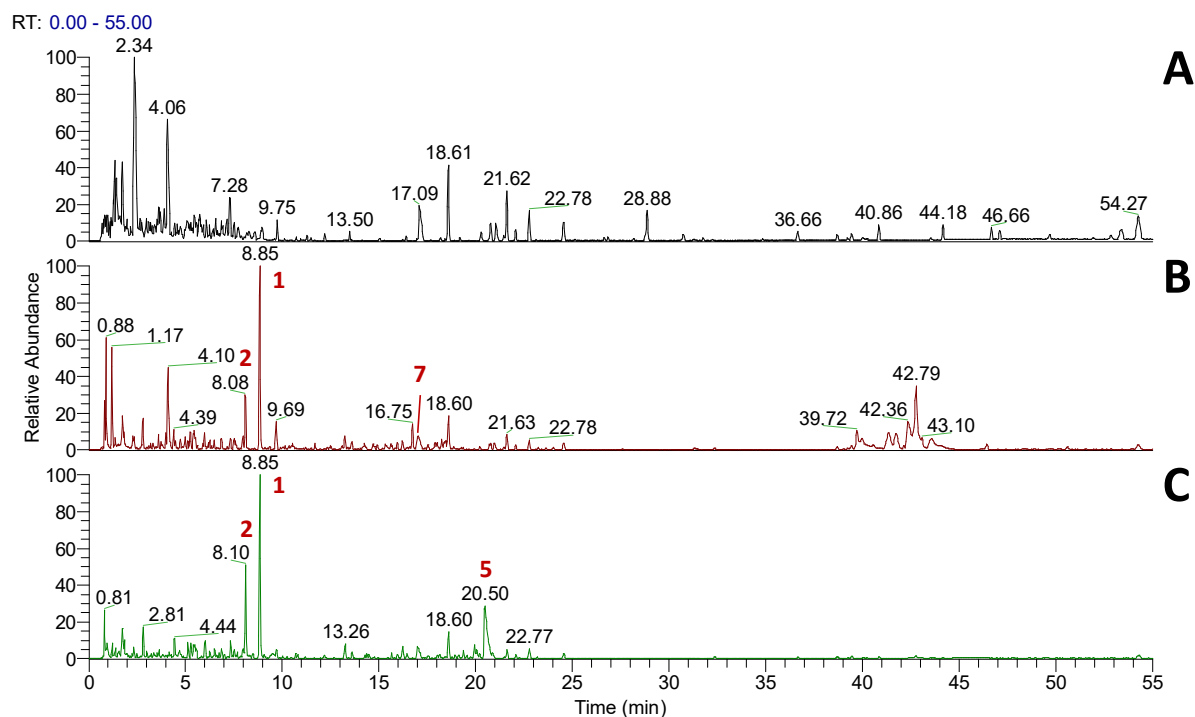

**Figure S2.** Base peak chromatograms ( $m/z$  140-2000) obtained by LC-MS in positive ion mode of the extracts from SM17 medium control (A), strain SL203 pSET152\_ermE\*p grown in SM17 medium (B), and strain SL294 pSET152\_ermE\*p grown in SM17 medium (C). The peaks corresponding to nocardamine (**1**), dehydroxynocardamine (**2**), coproporphyrin (**5**), and detoxin S<sub>1</sub> (**7**) are labelled.

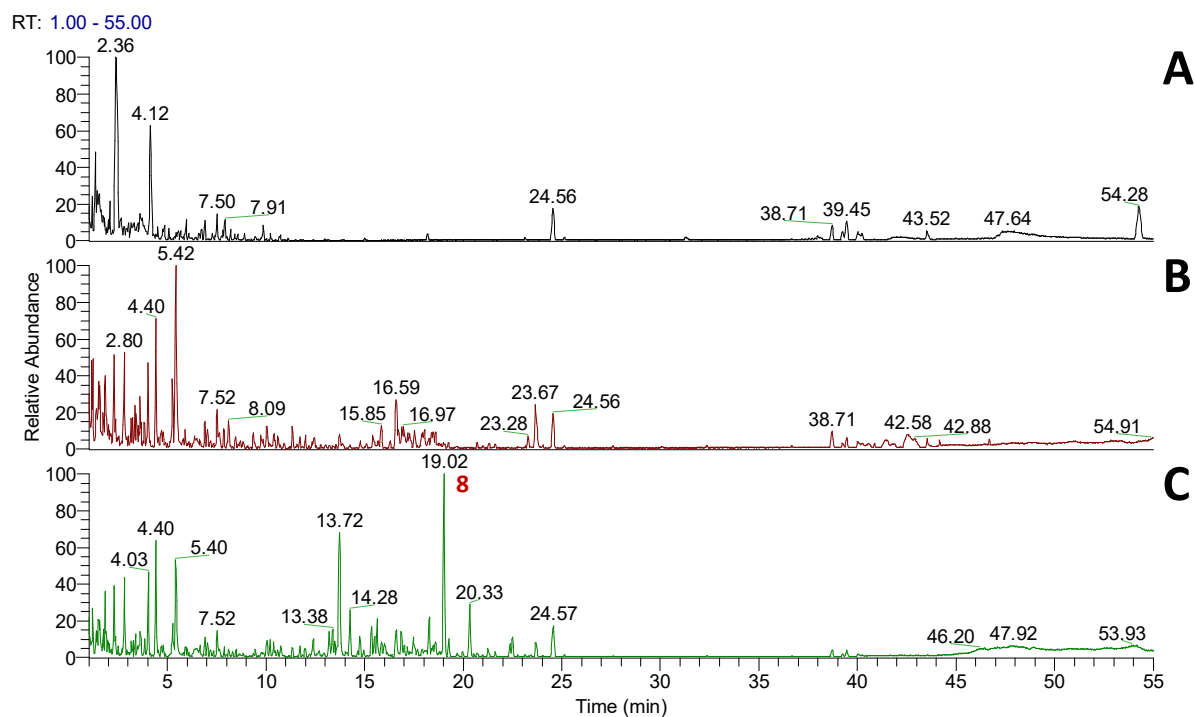

**Figure S3.** Base peak chromatograms ( $m/z$  140-2000) obtained by LC-MS in positive ion mode of the extracts from MYM medium control (A), strain SL203 pSET152\_ermE\*p grown in MYM medium (B), and strain SL203 pSET152\_ermE\*p\_ctg3\_1243 grown in MYM medium (C). The peak corresponding to coprisidin A (**8**) is labelled.

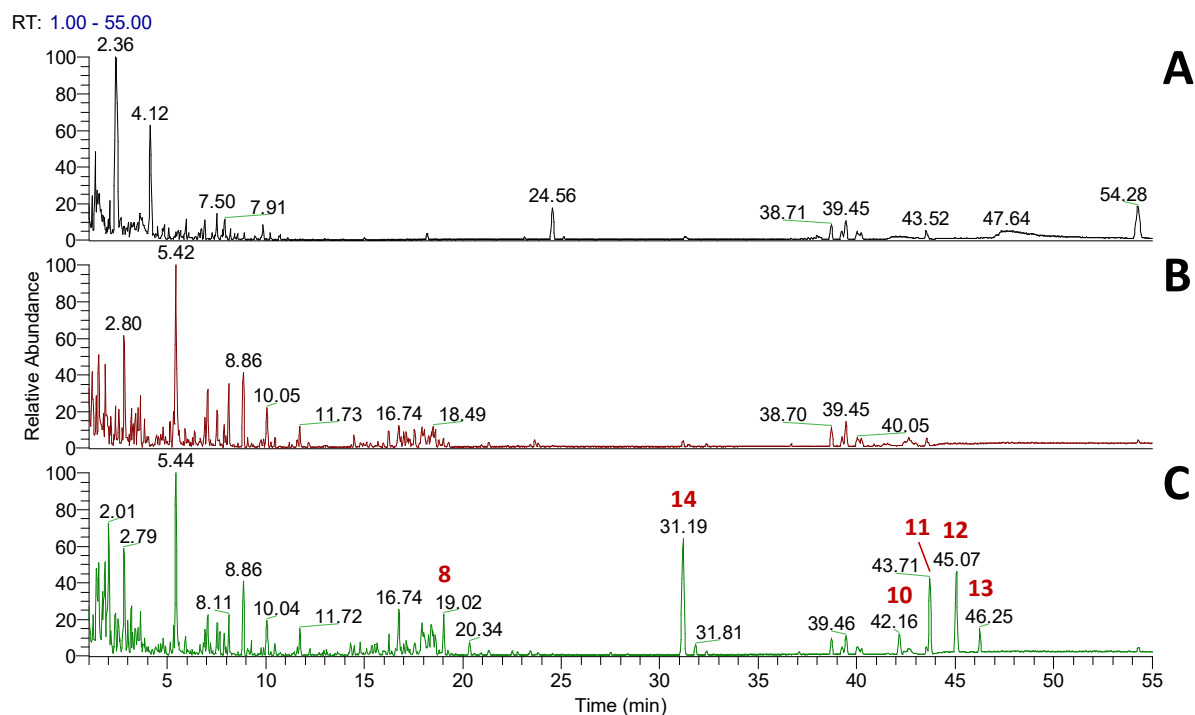

**Figure S4.** Base peak chromatograms ( $m/z$  140-2000) obtained by LC-MS in positive ion mode of the extracts from MYM medium control (A), strain SL294 pSET152\_ermE\*p grown in MYM medium (B), and strain SL294 pSET152\_ermE\*p\_ctg3\_1243 grown in MYM medium (C). The peaks corresponding to coprisidin A (**8**), saccharoquinoline (**14**) and the congeners nonactin (**10**), monactin (**11**), isodinactin (**12**), and either trinactin or isotrinactin (**13**) are labelled.







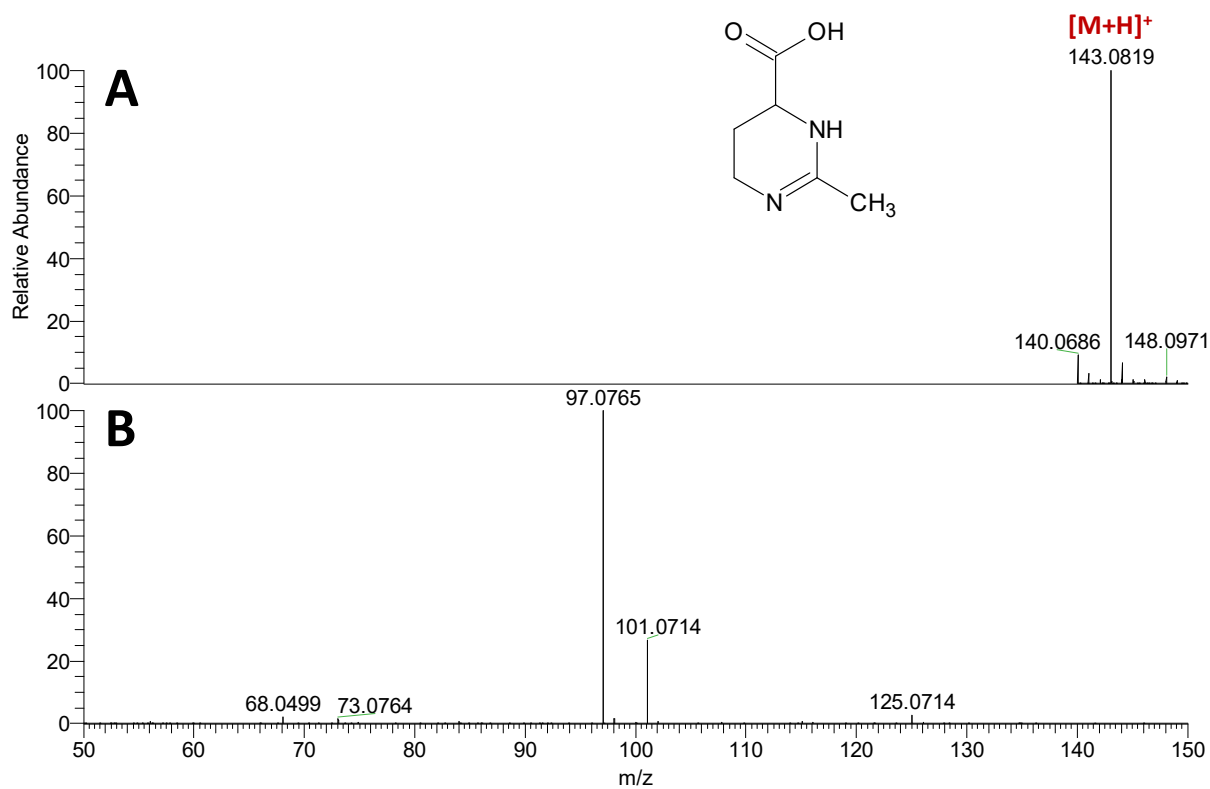

**Figure S8.** High resolution ESI mass spectrum of ectoine (**4**) at  $R_t$  0.80-0.91 min (A) and high resolution MS/MS spectrum of its  $[M+H]^+$  ion at  $m/z$  143.0819 (B).

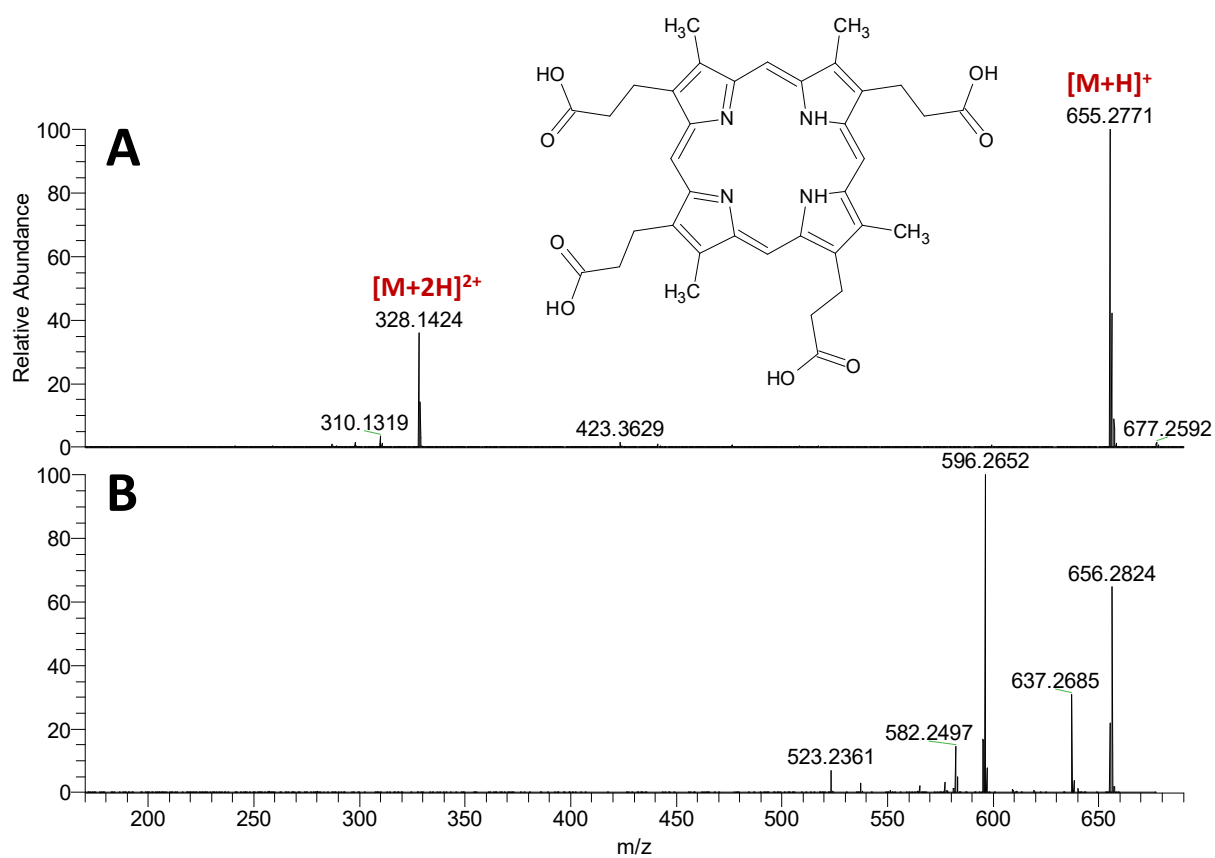

**Figure S9.** High resolution ESI mass spectrum of coproporphyrin (**5**) at  $R_t$  20.41-20.82 min (A) and high resolution MS/MS spectrum of its  $[M+H]^+$  ion at  $m/z$  655.2771 (B).



RT: 13.00 - 23.00

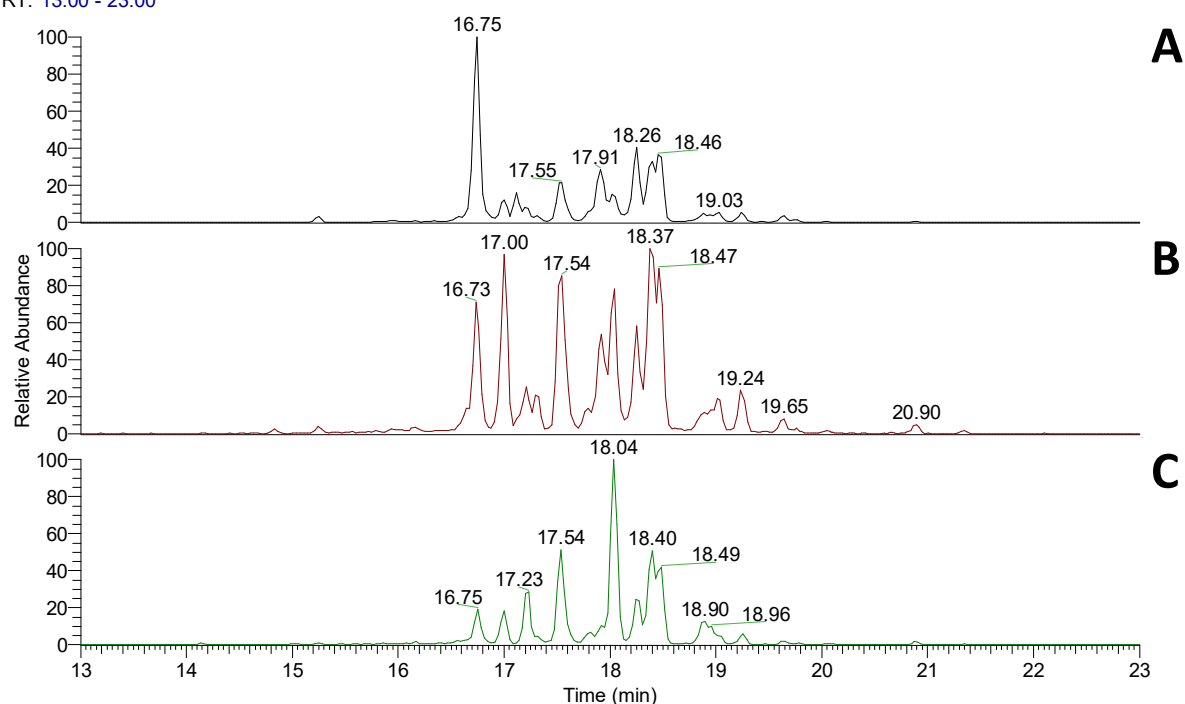

**Figure S10.** Extracted ion chromatograms ( $m/z$  482.2537±0.0024) obtained by LC-MS in positive ion mode of the extracts from strain SL203 pSET152\_ermE\*p grown in SM17 medium (A), strain SL203 pSET152\_ermE\*p grown in MYM medium (B), and strain SL294 pSET152\_ermE\*p grown in SM17 medium (C). This  $m/z$  value corresponds to the  $[M+H]^+$  ion of the various sceliphrolactam isomers.



RT: 0.00 - 25.00

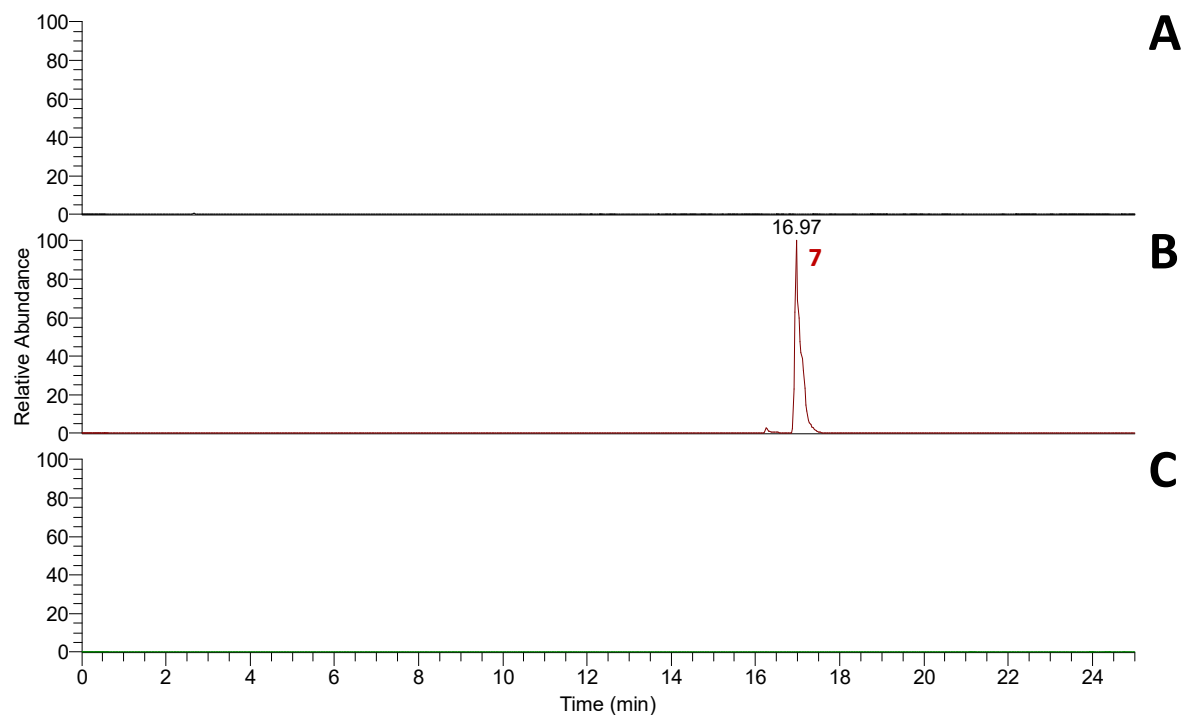

**Figure S12.** Extracted ion chromatograms ( $m/z$  518.3225 $\pm$ 0.0026) obtained by LC-MS in positive ion mode of the extracts from SM17 medium control (A), strain SL203 pSET152\_ermE\*p grown in SM17 medium (B), and strain SL294 pSET152\_ermE\*p grown in SM17 medium (C). This  $m/z$  value corresponds to the  $[M+H]^+$  ion of detoxin S<sub>1</sub> (7).

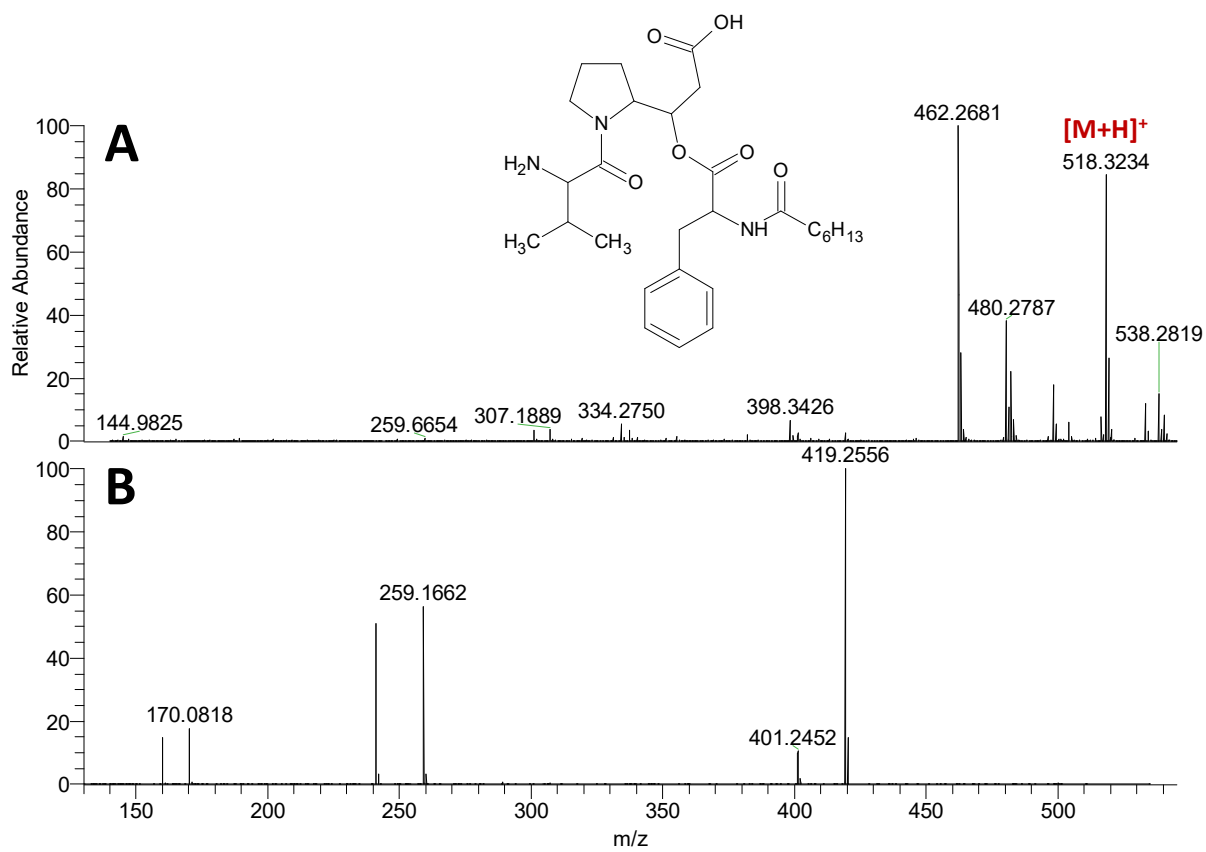

**Figure S13.** High resolution ESI mass spectrum of detoxin S<sub>1</sub> (7) at R<sub>t</sub> 16.86-17.31 min (A) and high resolution MS/MS spectrum of its [M+H]<sup>+</sup> ion at *m/z* 518.3234 (B). The structure of the *N*-acyl chain attached to the Phe is not known.

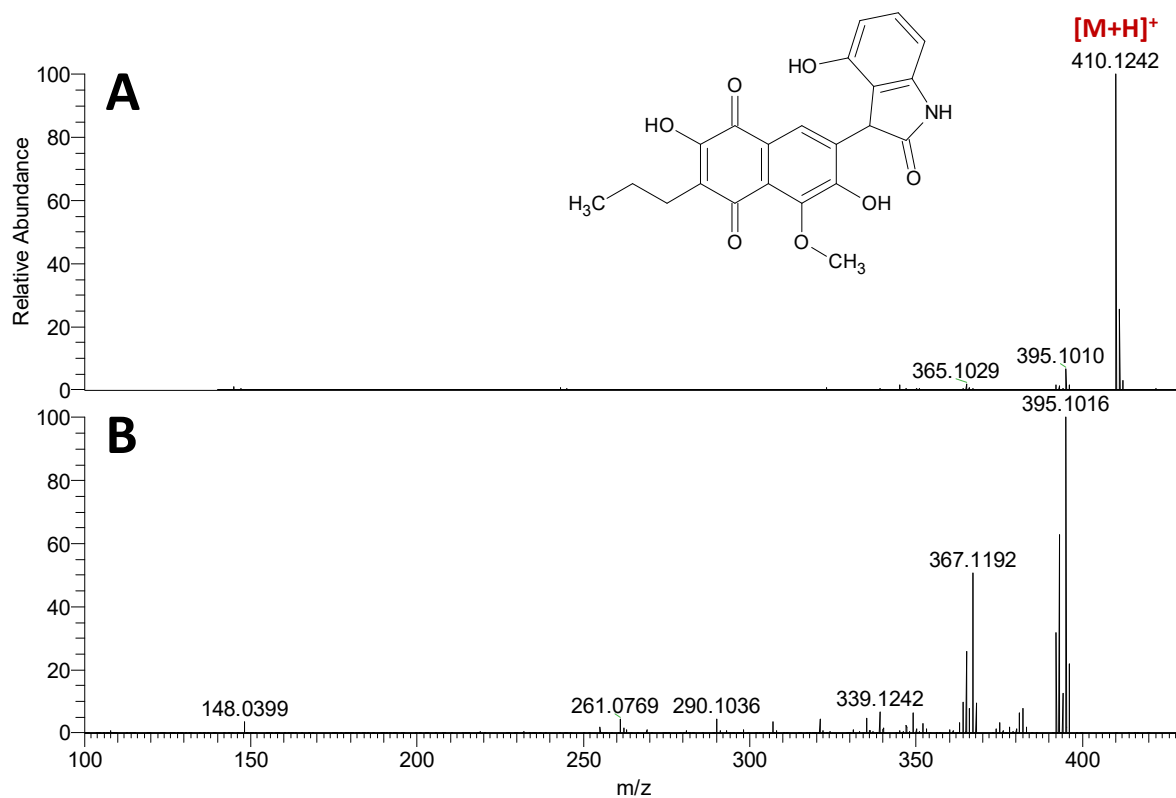

**Figure S14.** High resolution ESI mass spectrum of coprisidin A (**8**) at  $R_t$  18.94-19.11 min (A) and high resolution MS/MS spectrum of its  $[M+H]^+$  ion at  $m/z$  410.1242 (B).

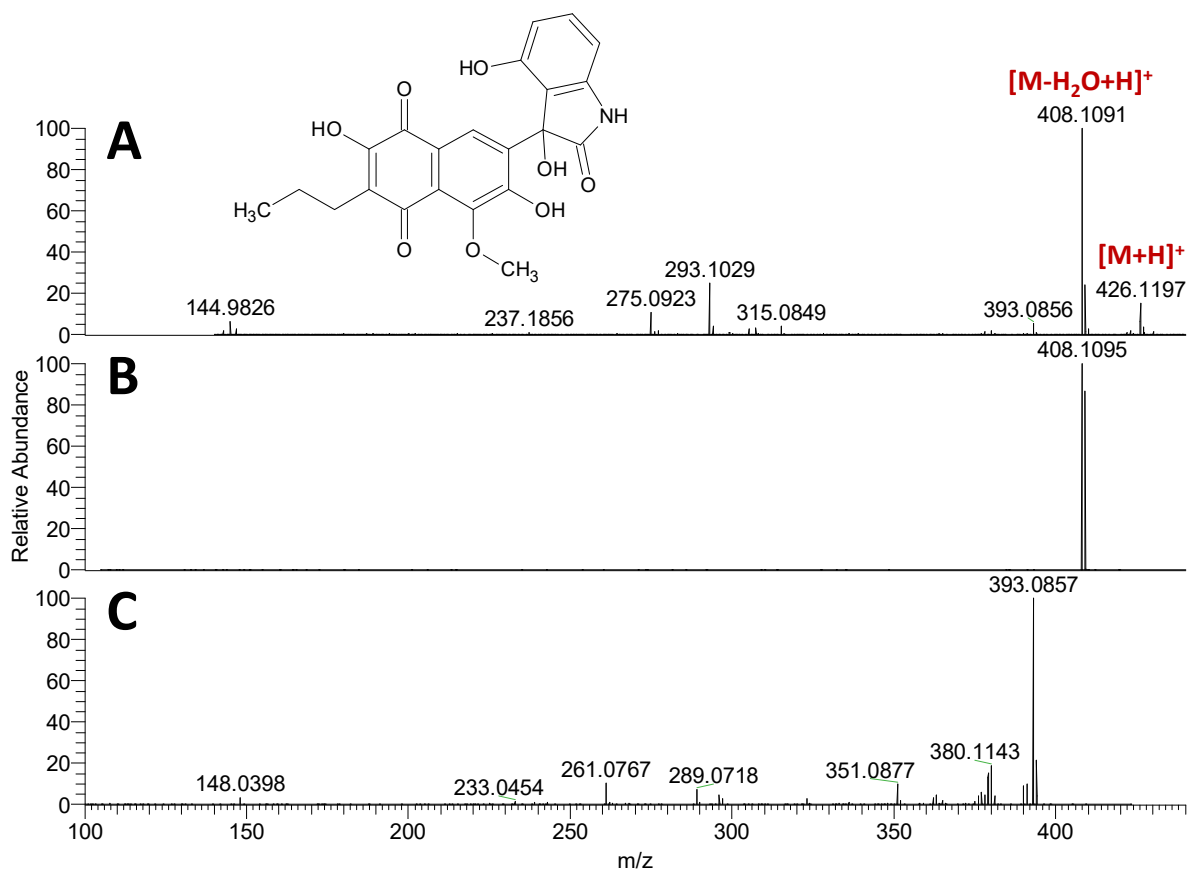

**Figure S15.** High resolution ESI mass spectrum of coprisidin B (**9**) at  $R_t$  17.41-17.53 min (A), high resolution MS/MS spectrum of its  $[M+H]^+$  ion at  $m/z$  426.1197 (B), and high resolution MS/MS spectrum of its  $[M-H_2O+H]^+$  ion (formed via in source decay) at  $m/z$  408.1091 (B).

MZ2102

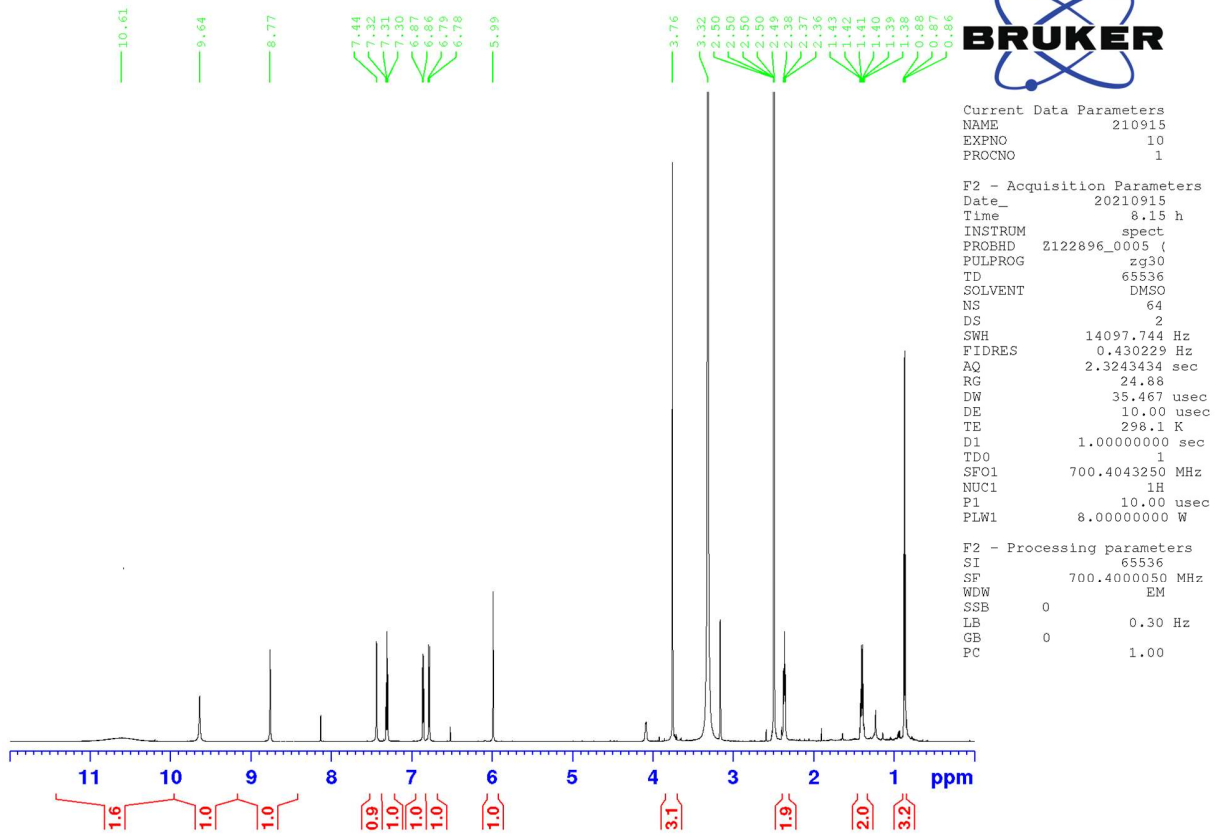

**Figure S16.**  $^1\text{H}$  NMR spectrum of coprisidin A (**1**) in  $\text{DMSO-}d_6$  at 700 MHz.

MZ2102

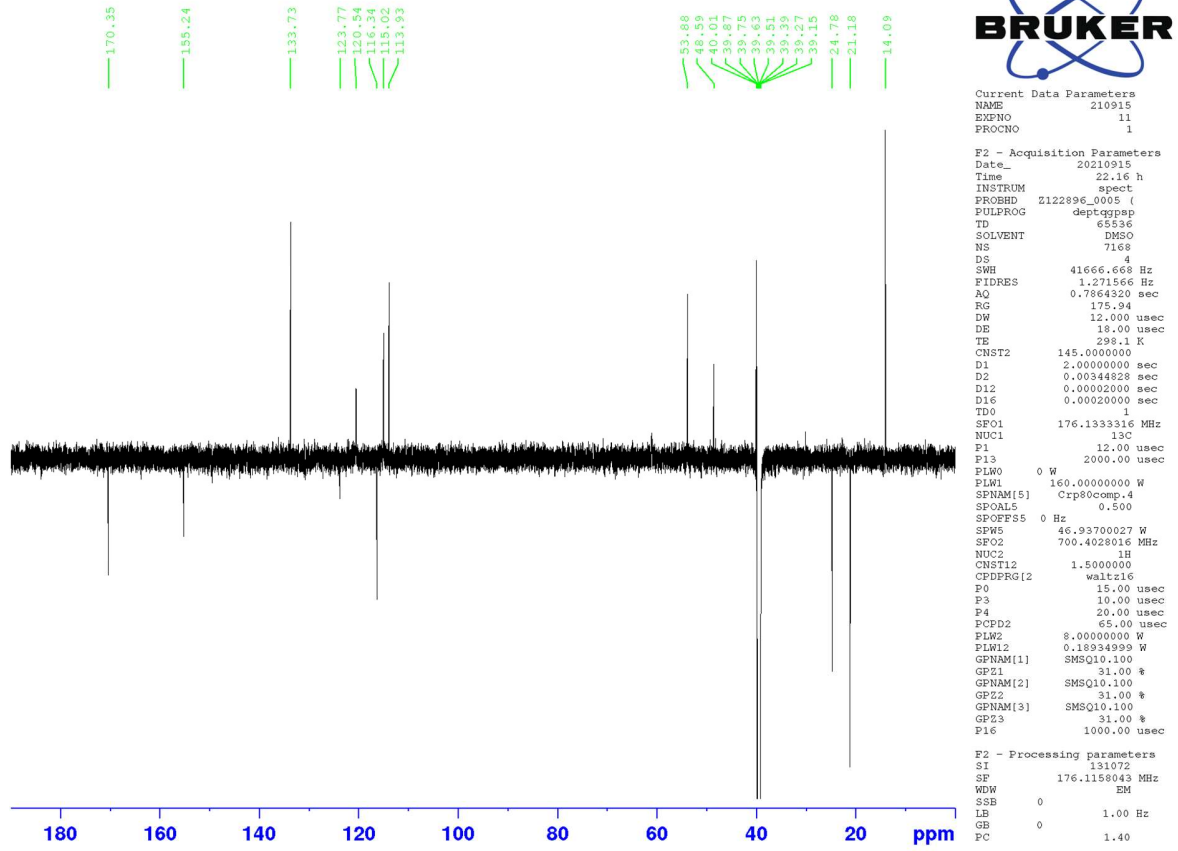

Figure S17. <sup>13</sup>C NMR spectrum of coprisidin A (1) in DMSO-*d*<sub>6</sub> at 176 MHz.



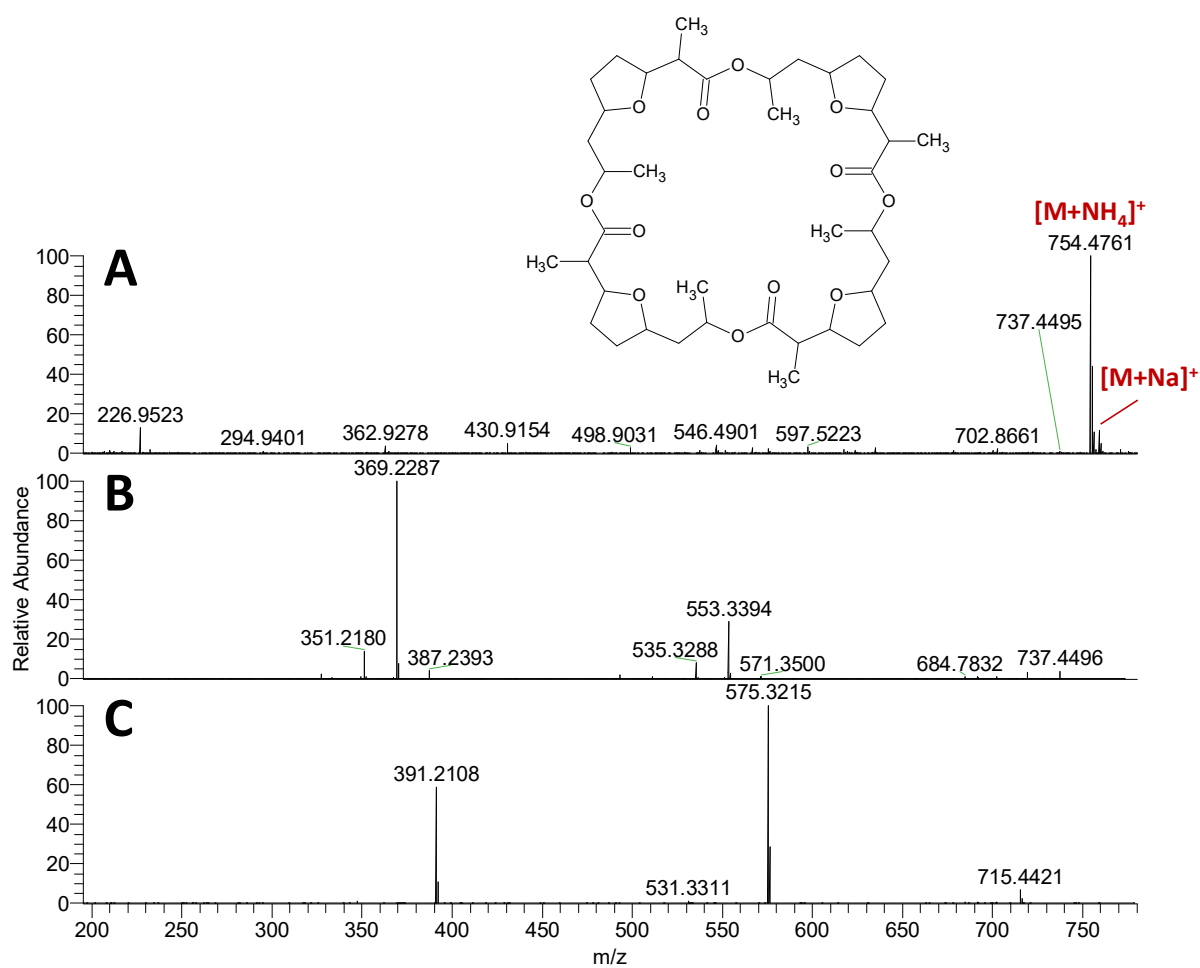

**Figure S18.** High resolution ESI mass spectrum of nonactin (**10**) at  $R_t$  42.05-42.26 min (A), high resolution MS/MS spectrum of its  $[M+NH_4]^+$  ion at  $m/z$  754.4761 (B), and high resolution MS/MS spectrum of its  $[M+Na]^+$  ion at  $m/z$  759.4316 (B).

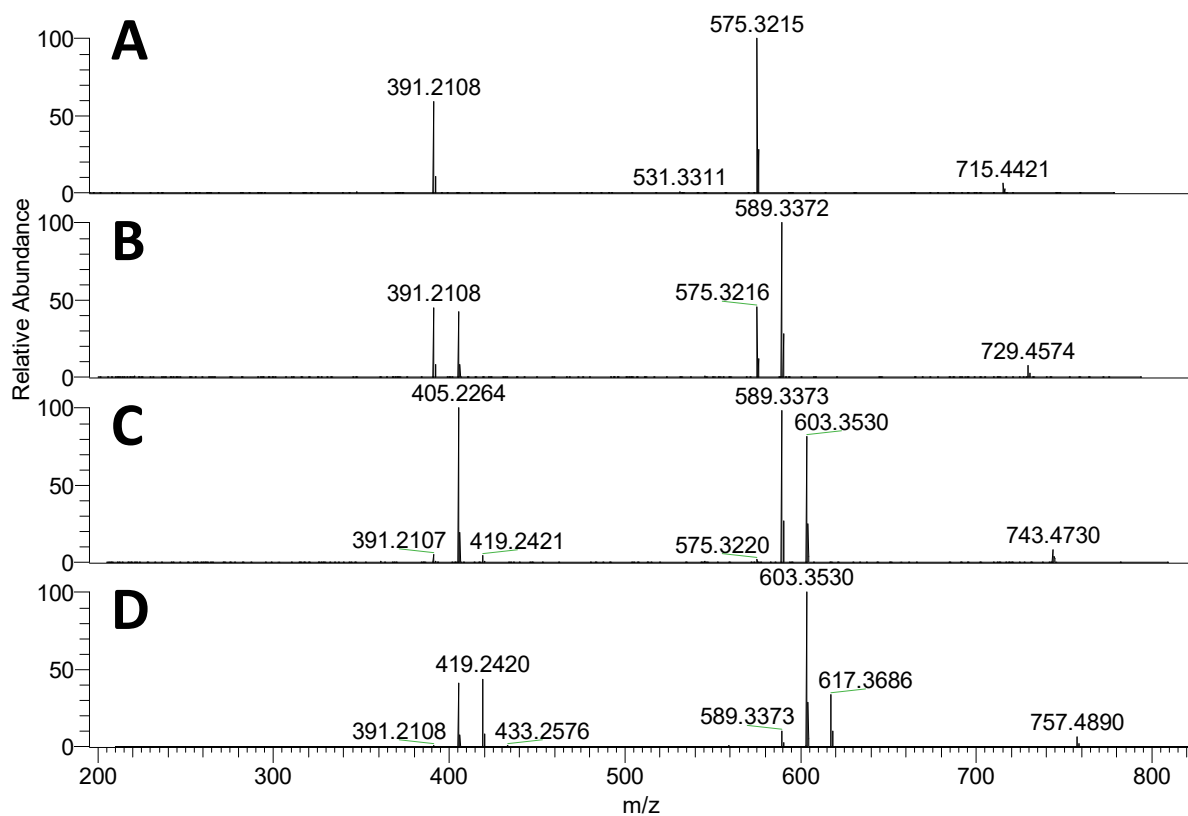

**Figure S19.** High resolution MS/MS spectra of the  $[M+Na]^+$  ions of nonactin (**10**) at  $m/z$  759.4316 (A), monactin (**11**) at  $m/z$  773.4463 (B), isodinactin (**12**) at  $m/z$  787.4616 (C), and either trinactin or isotrinctin (**13**) at  $m/z$  801.4781 (D).

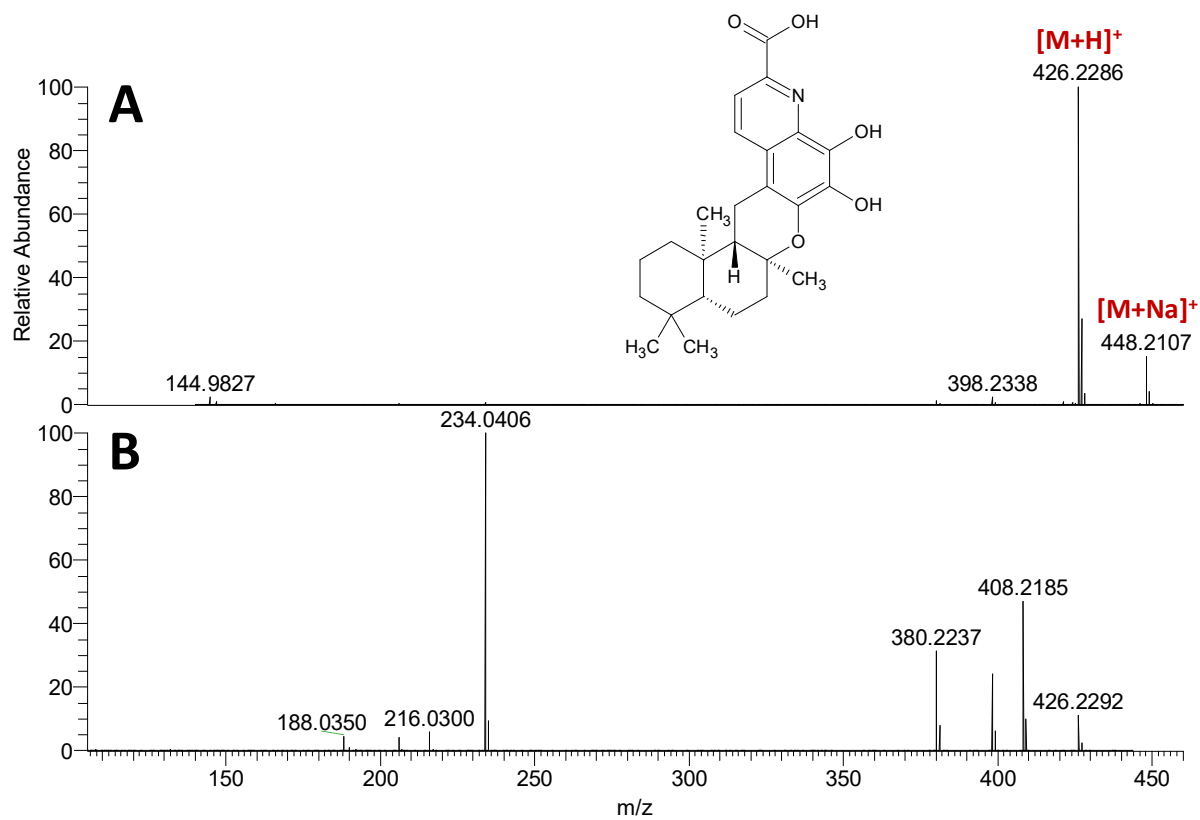

**Figure S20.** High resolution ESI mass spectrum of saccharoquinoline (14) at  $R_t$  31.04-31.31 min (A) and high resolution MS/MS spectrum of its  $[M+H]^+$  ion at  $m/z$  426.2286 (B).

MZ2204

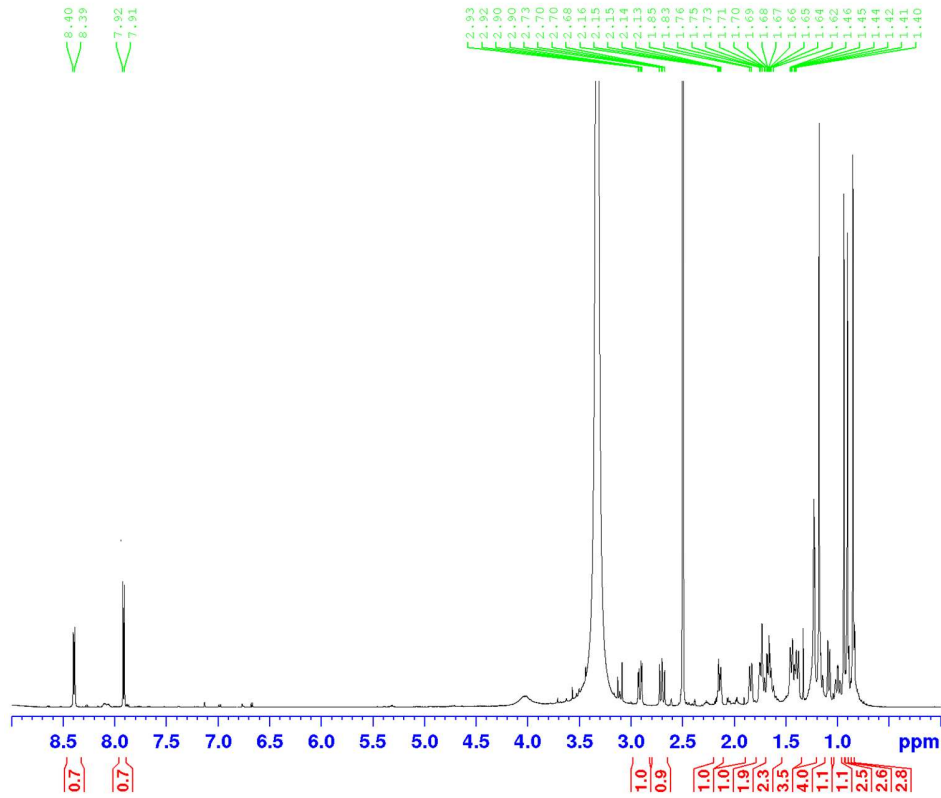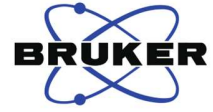

Current Data Parameters  
NAME 220526\_MZ2204  
EXPNO 40  
PROCNO 1

F2 - Acquisition Parameters  
Date\_ 20220524  
Time 22.09 h  
INSTRUM Avance Neo 600SB  
PROBHD Z168793\_0003 (   
PULPROG zg30  
TD 65536  
SOLVENT DMSO  
NS 16  
DS 2  
SWH 11904.762 Hz  
FIDRES 0.363304 Hz  
AQ 2.7525120 sec  
RG 89.6057  
DW 42.000 usec  
DE 14.39 usec  
TE 298.1 K  
D1 1.00000000 sec  
TD0 1  
SF01 600.1837061 MHz  
NUC1 1H  
FO 2.67 usec  
P1 8.00 usec  
PLW1 8.94060040 W

F2 - Processing parameters  
ST 65536  
SF 600.1800046 MHz  
WDW EM  
SSB 0  
LB 0.30 Hz  
GB 0  
PC 1.00

**Figure S21.**  $^1\text{H}$  NMR spectrum of saccharoquinoline (**14**) in  $\text{DMSO-}d_6$  at 600 MHz.

MZ2204

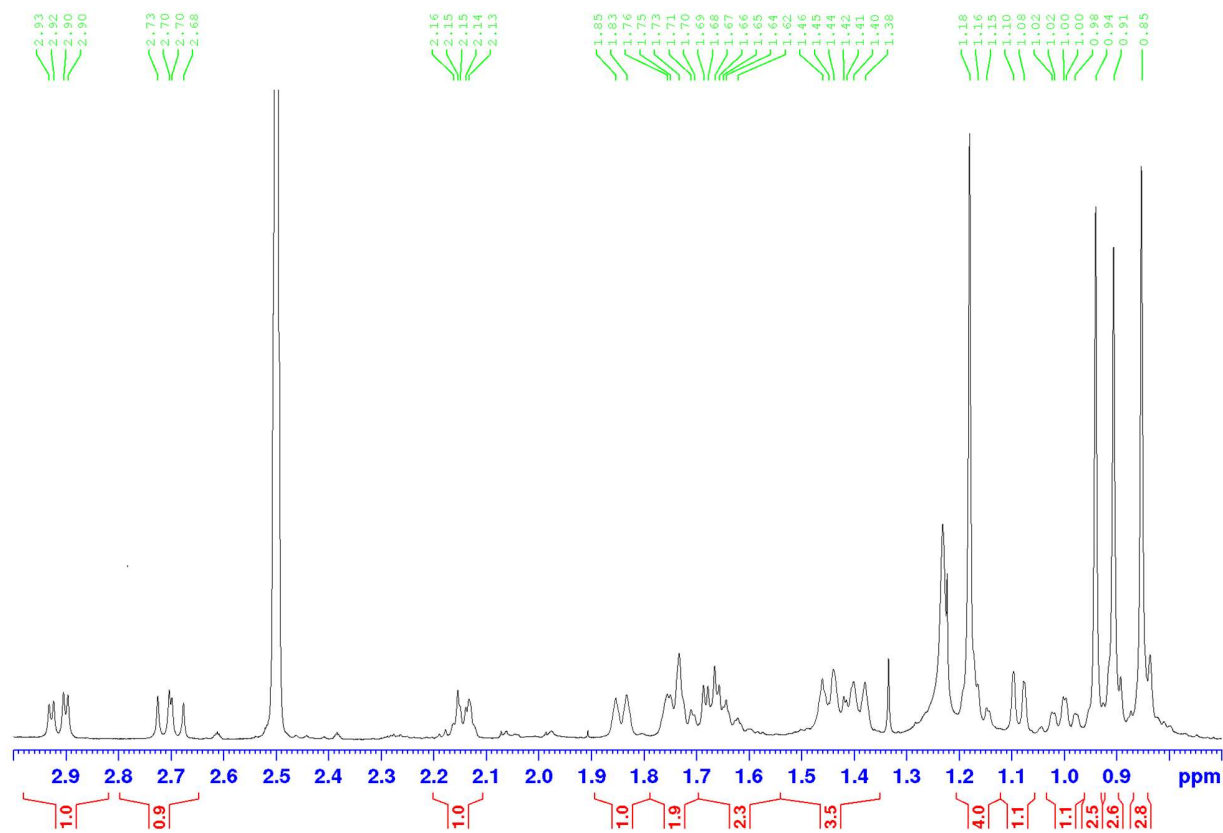

**Figure S22.** <sup>1</sup>H NMR spectrum of saccharoquinoline (14) in DMSO-*d*<sub>6</sub> at 600 MHz (zoom).

MZ2204

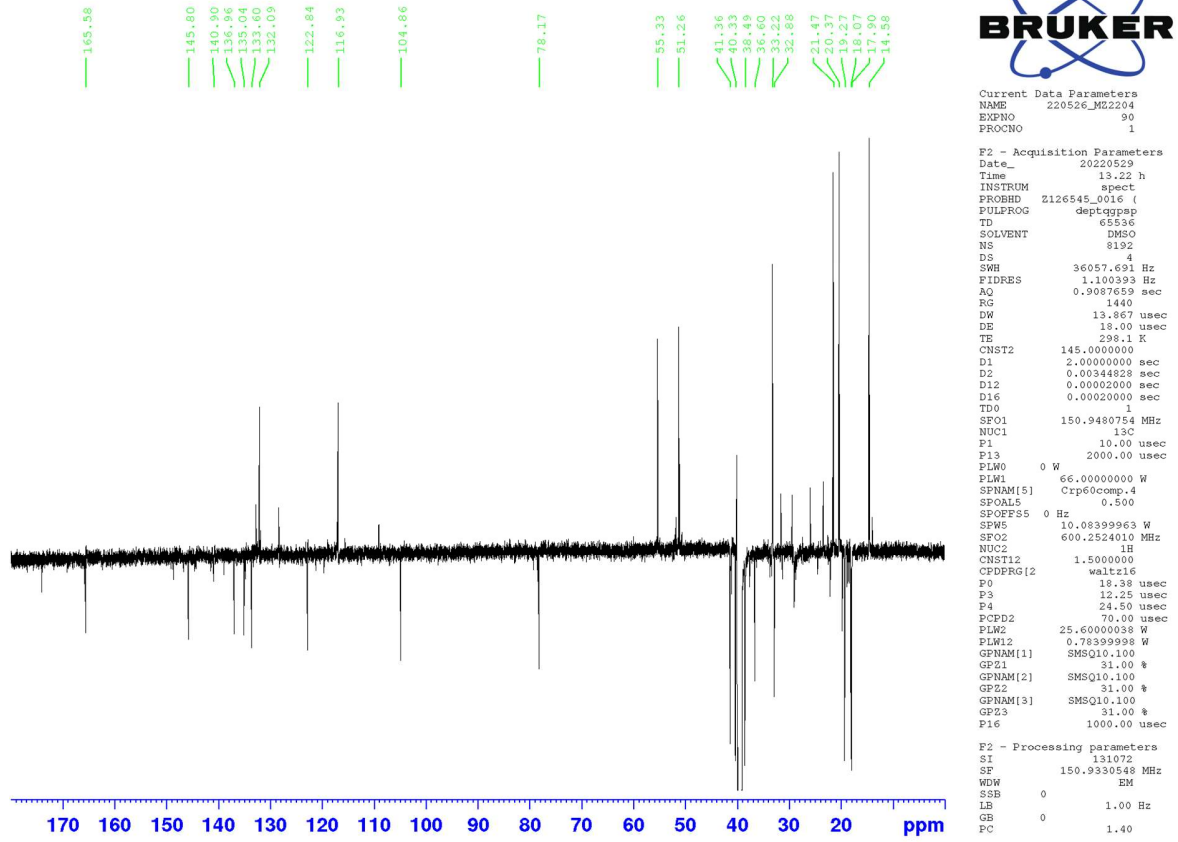

Figure S23.  $^{13}\text{C}$  NMR spectrum of saccharoquinoline (14) in  $\text{DMSO-}d_6$  at 151 MHz.

MZ2204

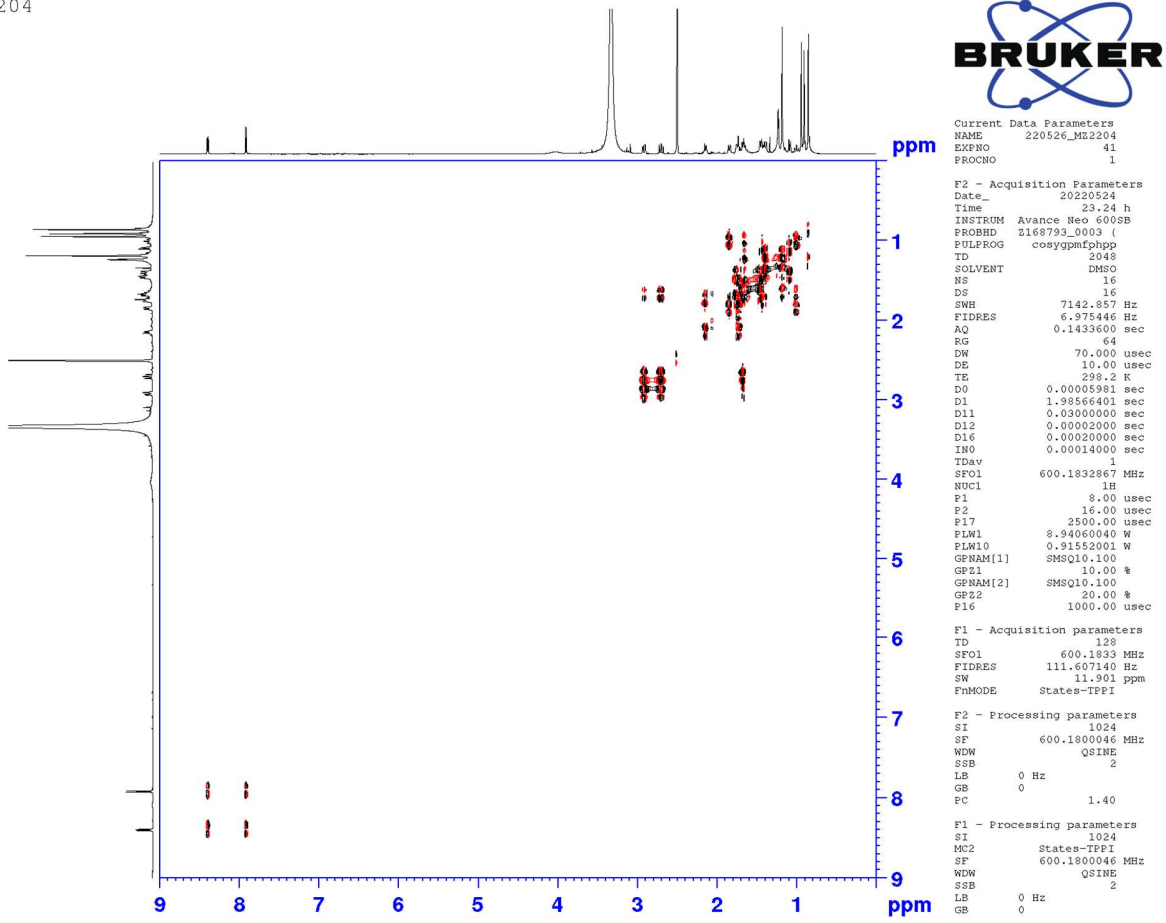

Figure S24. COSY spectrum of saccharoquinoline (14) in DMSO- $d_6$  at 600 MHz.

MZ2204

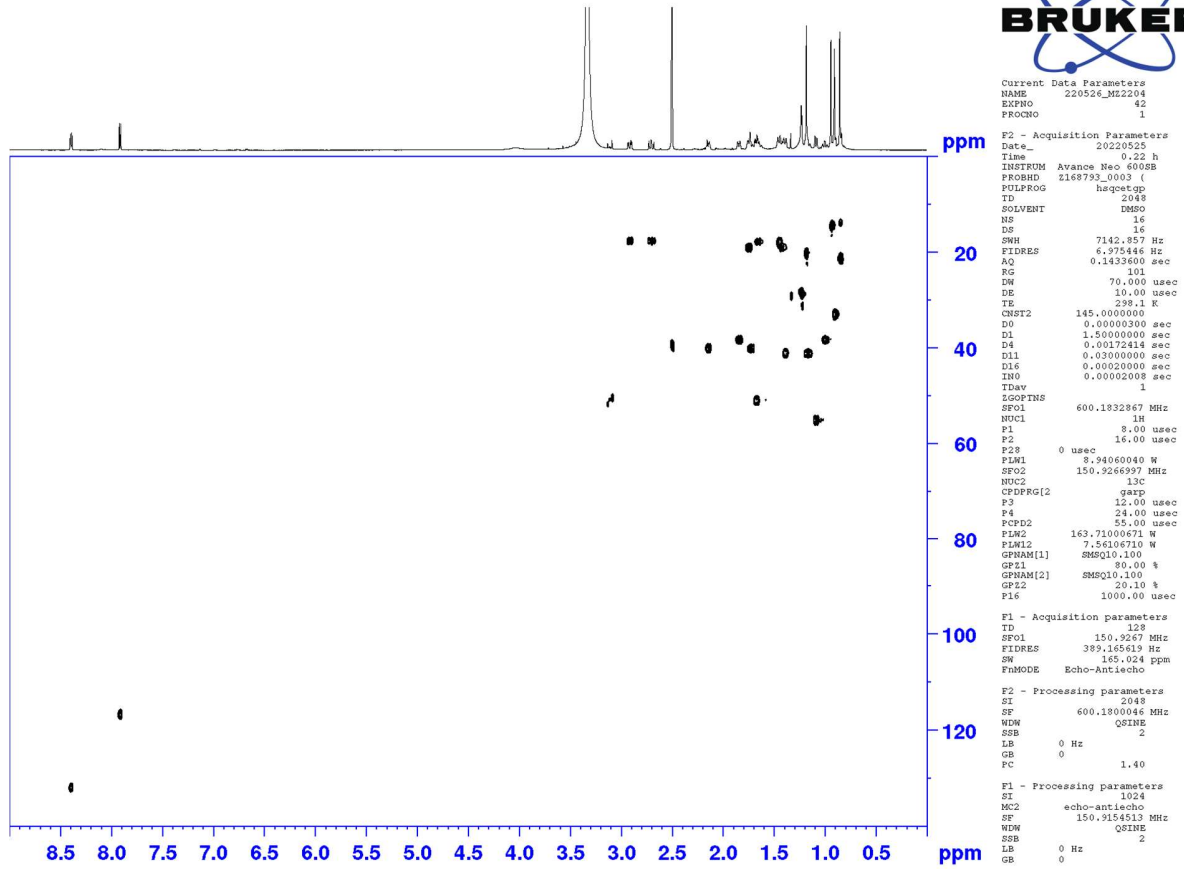

Figure S25. HSQC spectrum of saccharoquinoline (14) in DMSO-*d*<sub>6</sub> at 600 MHz.



MZ2204

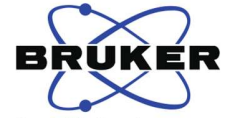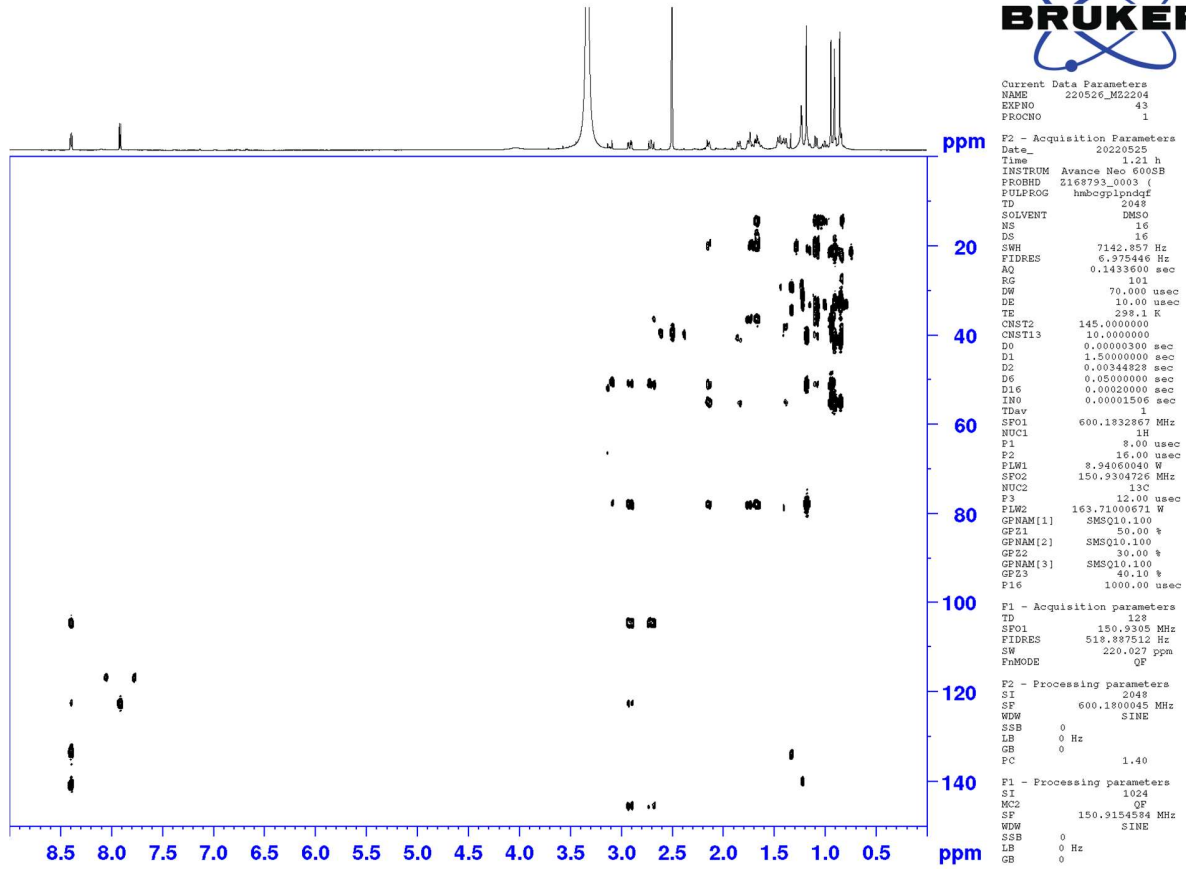

Figure S26. HMBC spectrum of saccharoquinoline (14) in DMSO-*d*<sub>6</sub> at 600 MHz.
